# Supplementary material for: Extractions of Medical Cannabis Cultivars and the Role of Decarboxylation in Optimal Receptor Responses
Source: PubMed Central journal article supplement (PMC6757234; doi:10.1089/can.2018.0067), 2019-09-23
Supplement: Supp_Data1-Table1.pdf [file Supp_Data1-Table1.pdf]

## Supplementary Data

### Liquid Chromatography-Mass Spectrometry Analyses and Lower Limit of Detection/Lower Limit of Quantitation

Instruments: Waters Acquity H-Class UPLC with Waters 3100 Mass spectrometer

Column: Acquity UPLC BEH column (2.1 mm × 50 mm, C-18, 1.7 μm ID)

Mobile phase: H<sub>2</sub>O (A) and MeOH (B), with 0.1% formic acid as follows: 0–4.5 min (30% A/70% B to 0%A/100% B, linear gradient), 4.5–5.0 min (0% A/100% B iso-

cratic), 5.0–5.2 min (0% A/100% B to 30% A/70% B, linear gradient), and 5.2–6 min (30% A/70% B isocratic).

Flow rate: 0.6 mL/min

Temperature: Sample injection plate=15°C; column=40°C

Ionization: Electrospray, positive (+ve) and negative (–ve)

Scan range: (150–500 m/z)

Mass single ion recordings: +ve=287.20, 311.20, 315.23, 317.25 m/z; –ve=357.21 and 359.22 m/z

**Supplementary Table S1. LLD and LLQ Values for the Phytocannabinoids in This Study**

| Phytocannabinoid     | LLD (ng/mL) | LLQ (ng/mL) |
|----------------------|-------------|-------------|
| Δ <sup>9</sup> -THC  | 1.0         | 2.5         |
| Δ <sup>9</sup> -THCA | 1.0         | 2.5         |
| CBD                  | 2.5         | 5.0         |
| CBDA                 | 1.0         | 2.5         |
| CBN                  | 6           | 12          |
| CBG                  | 59          | 76          |

Δ<sup>9</sup>-THC, Δ<sup>9</sup>-tetrahydrocannabinol; Δ<sup>9</sup>-THCA, Δ<sup>9</sup>-tetrahydrocannabinolic acid; CBD, cannabidiol; CBDA, cannabidiolic acid; CBG, cannabigerol; CBN, cannabinol; LLD, lower limit of detection; LLQ, lower limit of quantitation.
