# Supplementary material for: Extractions of Medical Cannabis Cultivars and the Role of Decarboxylation in Optimal Receptor Responses
Source: PubMed Central journal article supplement (PMC6757234; doi:10.1089/can.2018.0067), 2019-09-23
Supplement: Supp_Fig1.pdf [file Supp_Fig1.pdf]

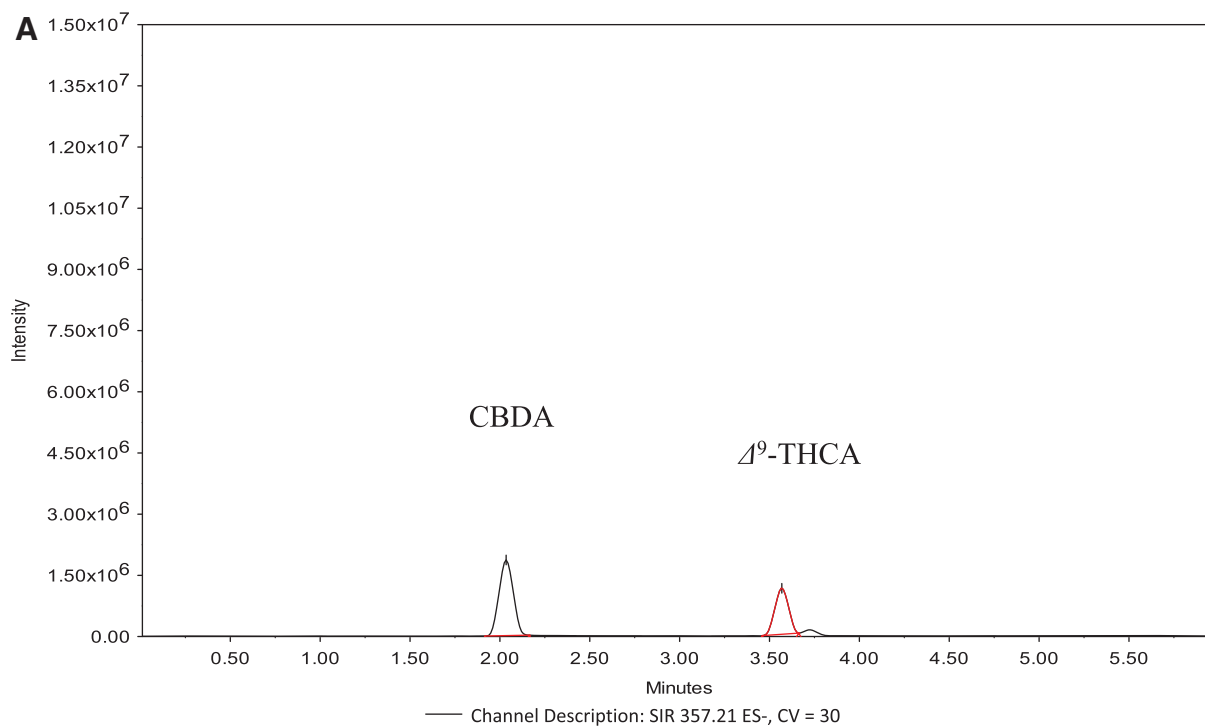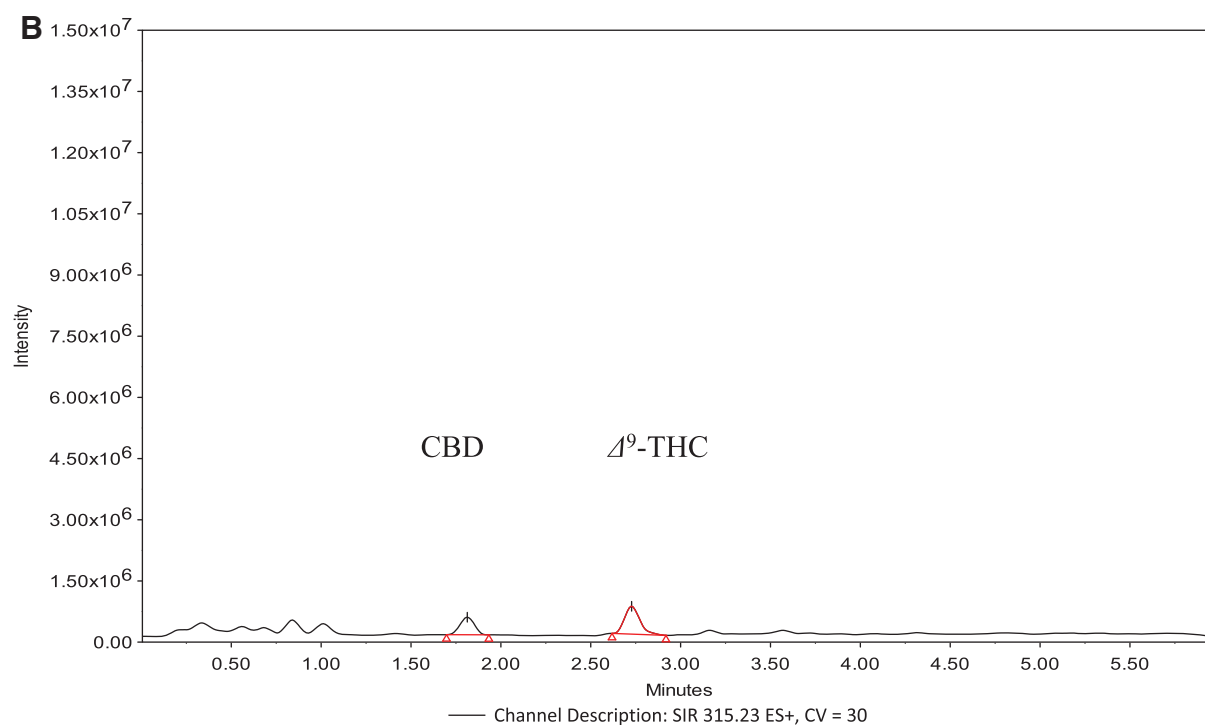

**SUPPLEMENTARY FIG. S1.** Representative mass chromatograms for cultivar 1 extract using UAE: **(A)** ESI (-ve) mode for detection of acidic phytocannabinoids, and **(B)** ESI (+ve) mode for detection of neutral phytocannabinoids. ESI, electron spray ionization; UAE, ultrasound-assisted extraction.
