# Supplementary material for: Extractions of Medical Cannabis Cultivars and the Role of Decarboxylation in Optimal Receptor Responses
Source: PubMed Central journal article supplement (PMC6757234; doi:10.1089/can.2018.0067), 2019-09-23
Supplement: Supp_Fig2.pdf [file Supp_Fig2.pdf]

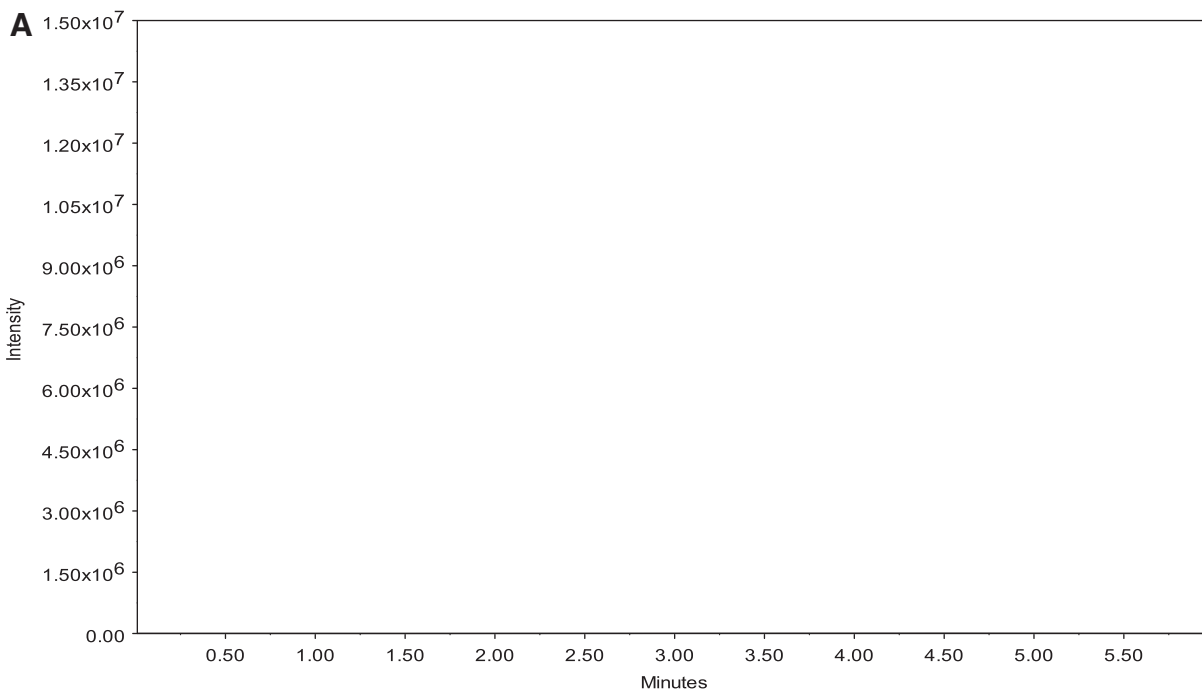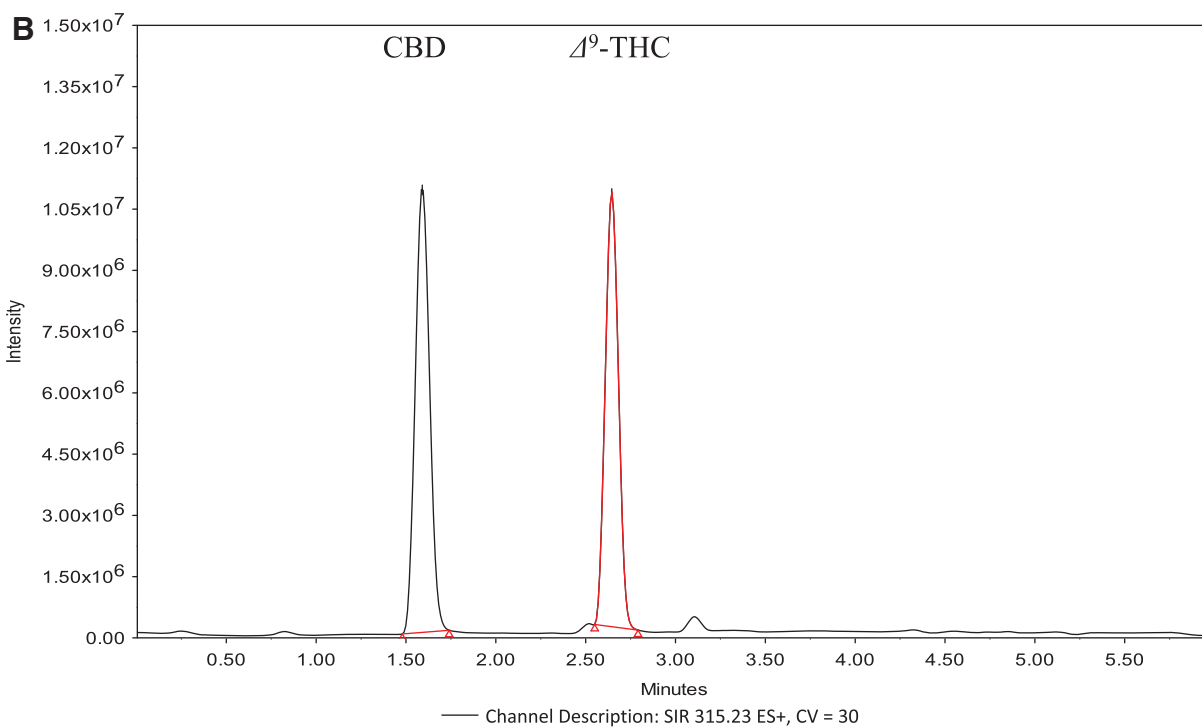

**SUPPLEMENTARY FIG. S2.** Representative mass chromatograms for cultivar 1 extract using MAE. **(A)** ESI (-ve) mode for detection of acidic phytocannabinoids and **(B)** ESI (+ve) mode for detection of neutral phytocannabinoids. MAE, microwave-assisted extraction.
