# Supplementary material for: Extractions of Medical Cannabis Cultivars and the Role of Decarboxylation in Optimal Receptor Responses
Source: PubMed Central journal article supplement (PMC6757234; doi:10.1089/can.2018.0067), 2019-09-23
Supplement: Supp_Fig6.pdf [file Supp_Fig6.pdf]

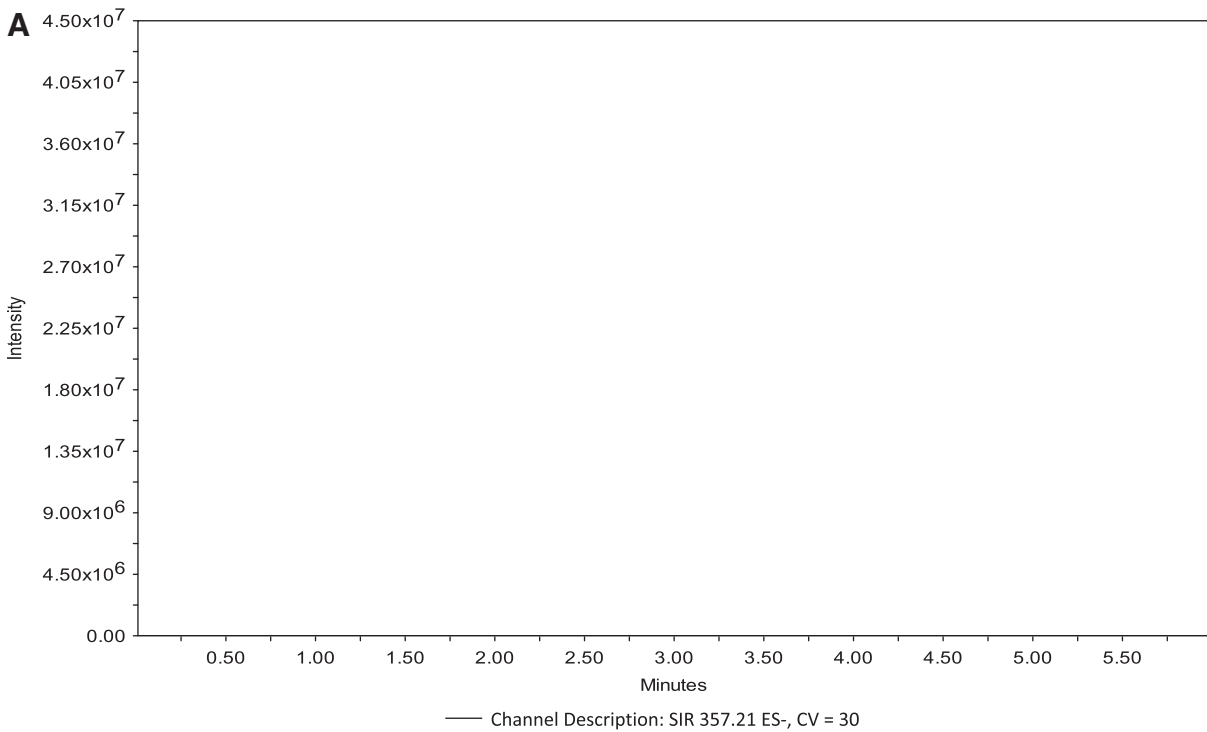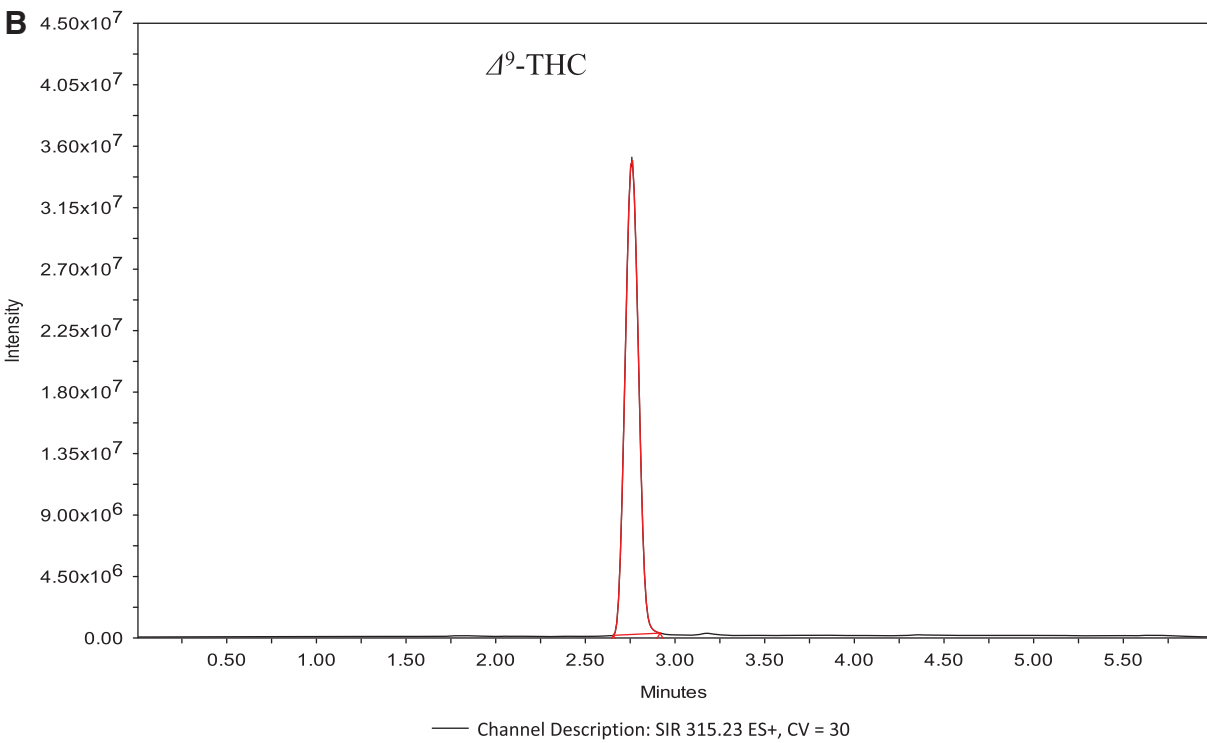

**SUPPLEMENTARY FIG. S6.** Representative mass chromatograms for cultivar 3 extract using MAE. **(A)** ESI (-ve) mode for detection of acidic phytocannabinoids, and **(B)** and **(C)** ESI (+ve) mode for detection of neutral phytocannabinoids at SIR 315.23 and 317.25 Da, respectively; SIR, single ion recording.

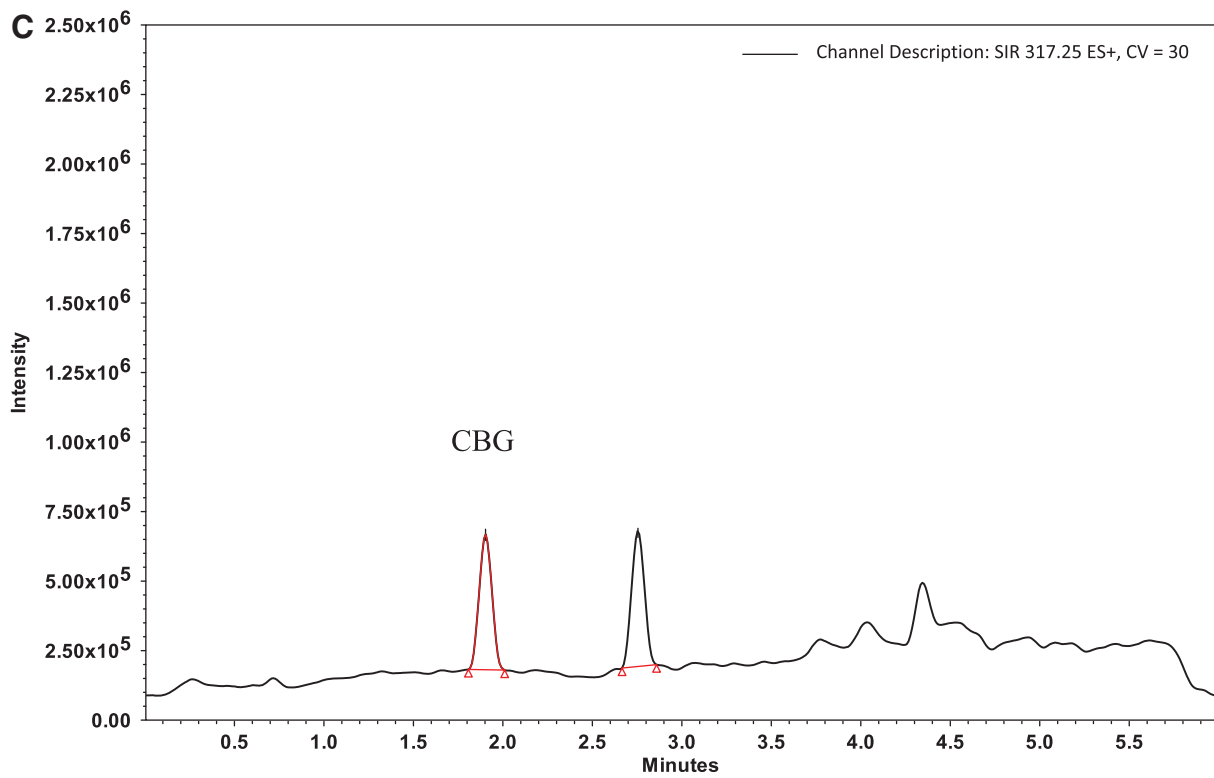

**SUPPLEMENTARY FIG. S6.** (Continued)
