# Supplementary material for: Extractions of Medical Cannabis Cultivars and the Role of Decarboxylation in Optimal Receptor Responses
Source: PubMed Central journal article supplement (PMC6757234; doi:10.1089/can.2018.0067), 2019-09-23
Supplement: Supp_Fig7.pdf [file Supp_Fig7.pdf]

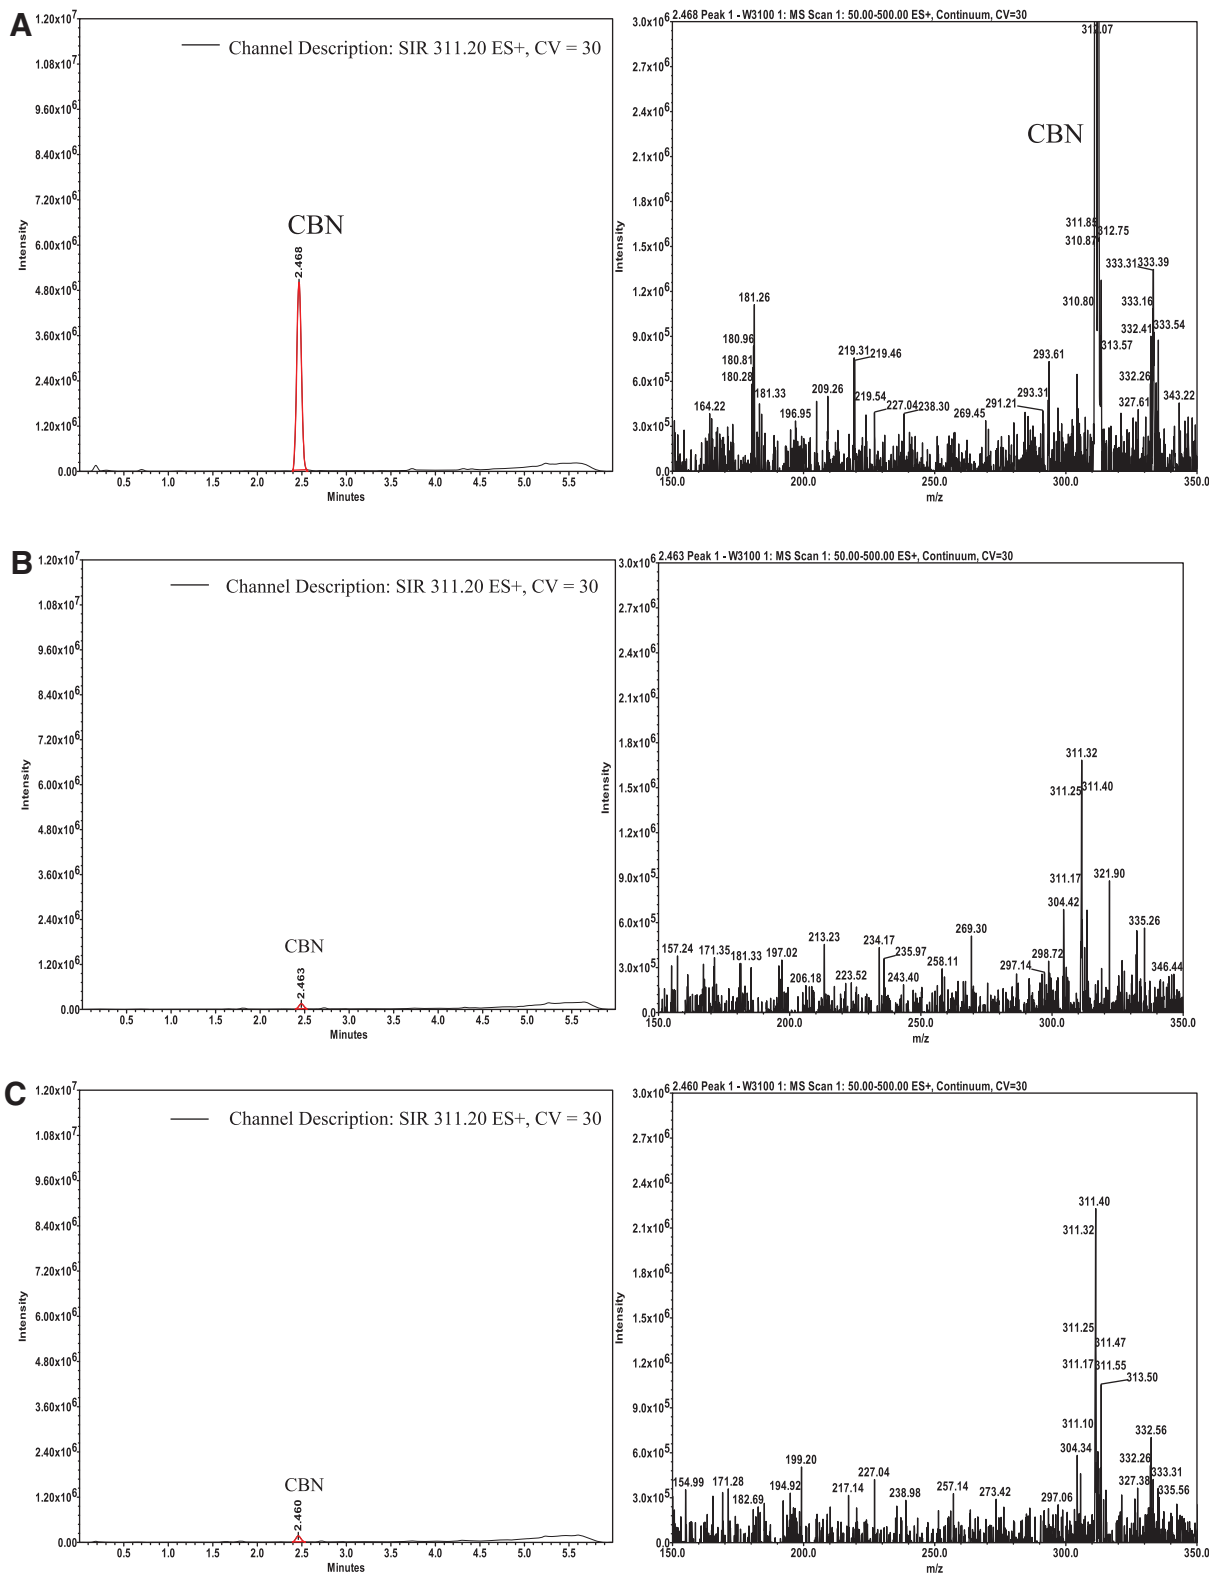

**SUPPLEMENTARY FIG. S7.** Comparison of representative mass chromatograms (left panel) and mass spectra (right panel) using ESI (+ve) mode SIR at 311.20 Da ( $m/z$ ,  $MH^+$ ) for CBN reference standard (**A**); Strain 1 extracts first subjected to UAE (**B**) or SFE (**C**) or Soxhlet (**D**) method, followed by microwave heating; (**E**) cultivar 3 extract obtained using MAE. SFE, supercritical fluid extraction. CBN, cannabinol.

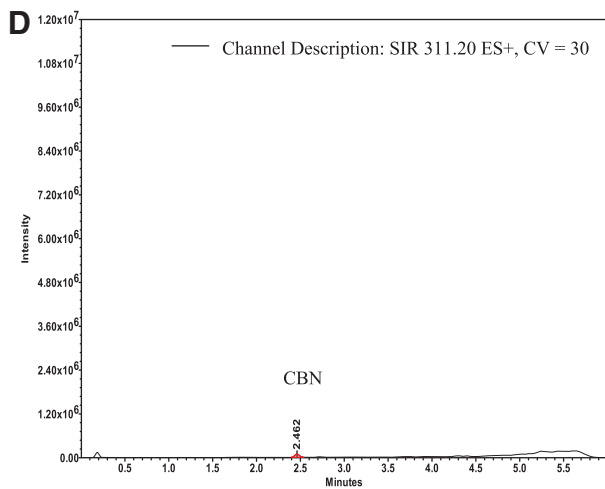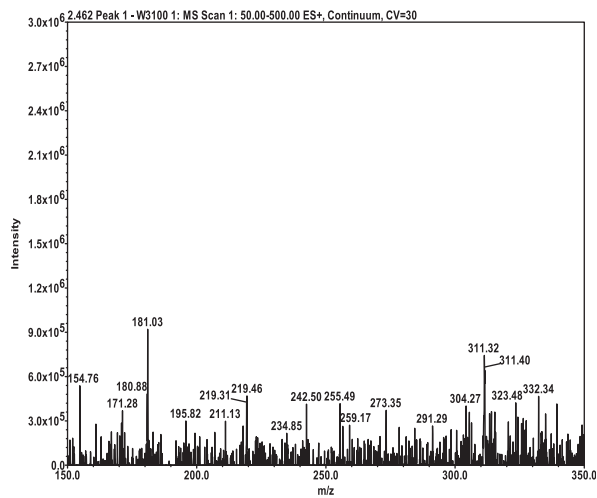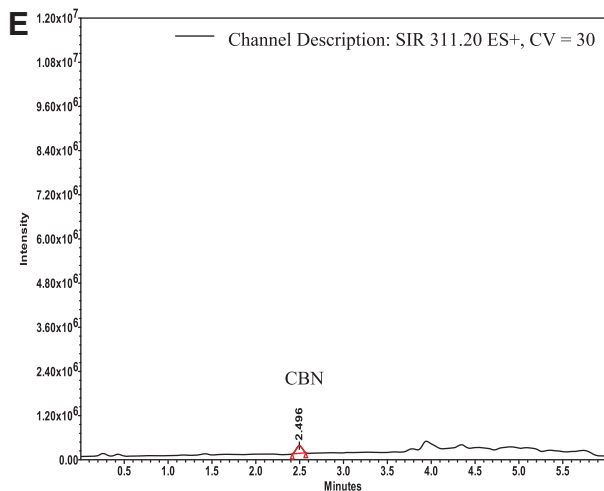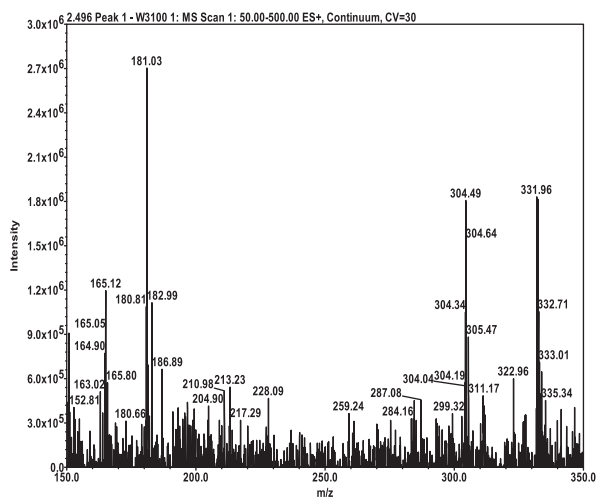

**SUPPLEMENTARY FIG. S7. (Continued)**
