# Supplementary material for: Extractions of Medical Cannabis Cultivars and the Role of Decarboxylation in Optimal Receptor Responses
Source: PubMed Central journal article supplement (PMC6757234; doi:10.1089/can.2018.0067), 2019-09-23
Supplement: Supp_Fig8.pdf [file Supp_Fig8.pdf]

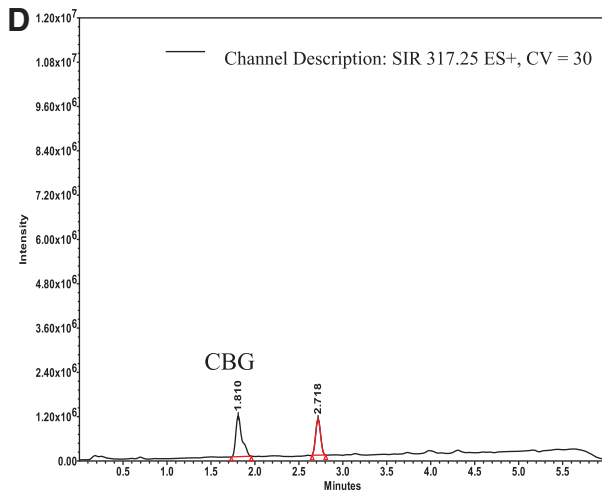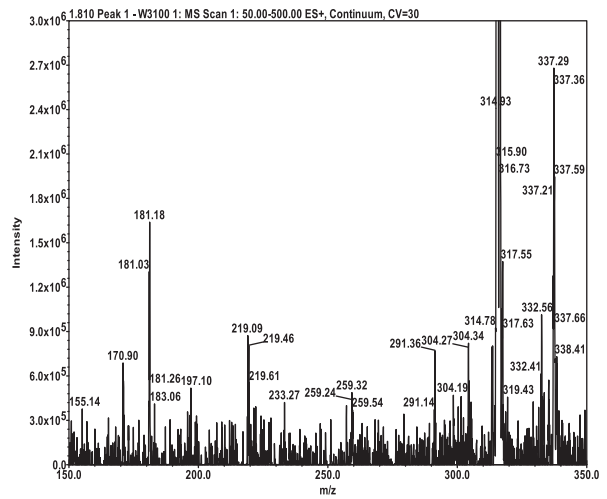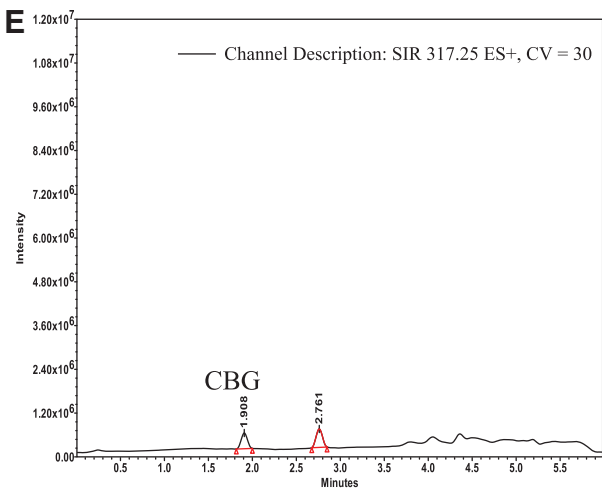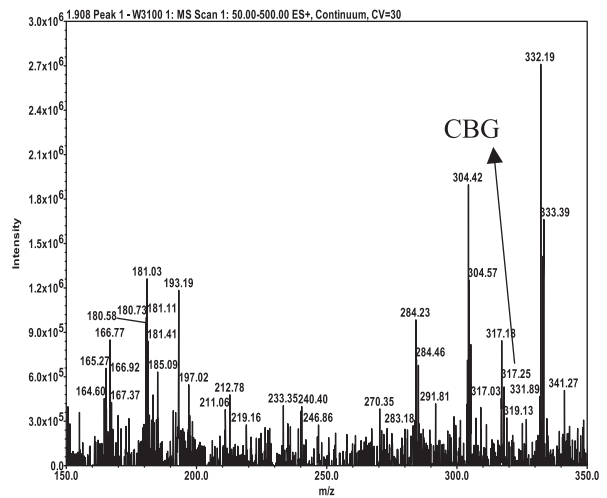

**SUPPLEMENTARY FIG. S8. (Continued)**
